# Supplementary material
Source: publisher site journal article supplement (https://www.dovepress.com/article/387793)
Supplement: Supplementary file 1 [file get_supplementary_file.php]

ORIGINAL RESEARCH

# Supplementary Data

**A**

**
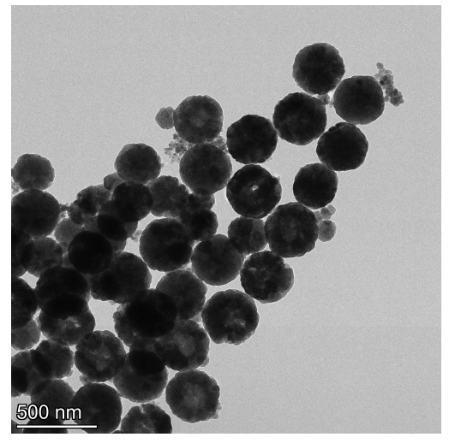
**

**B**

**
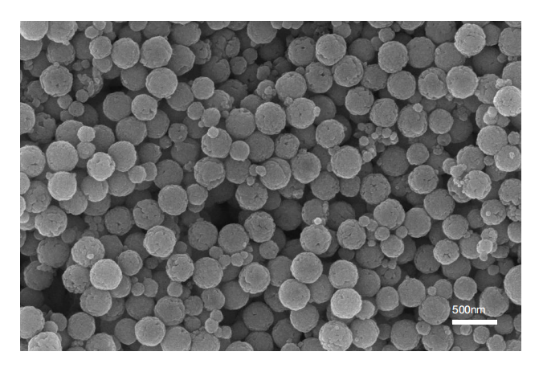
**

**C**

**
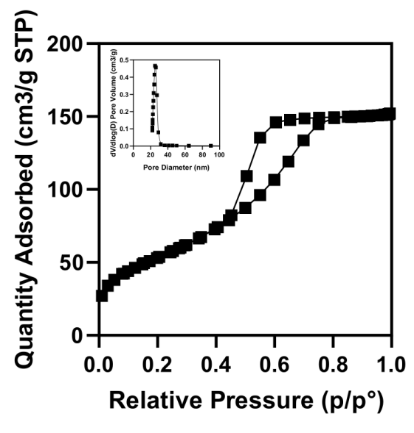
**

**D**

**
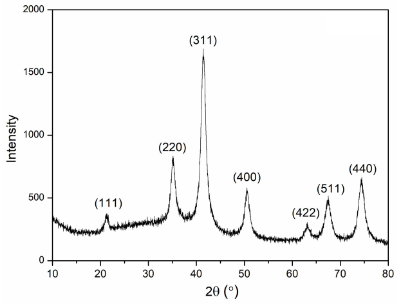
**

**E**


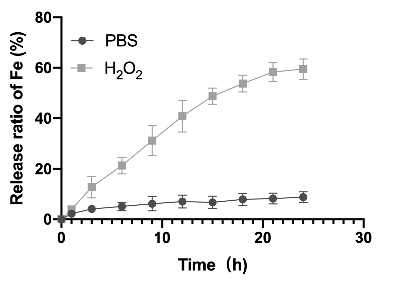


**Figure S1：**Characterization of HFON and DOX@HFON: (A) TEM of HFON；(B) SEM images of DOX@HFON; (C) Test result of BET: specific surface area of HFON; (D) XRD pattern of HFON; (E) Fe release curve in vitro.


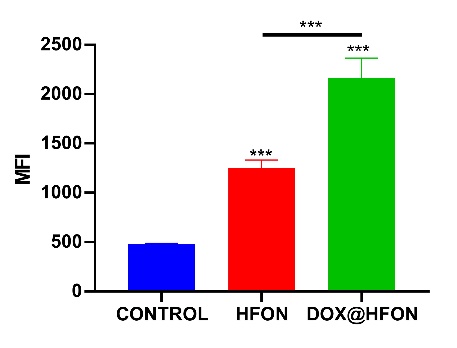


**Figure S2：**Quantitative analysis of ROS generation. (****P* < 0.001)


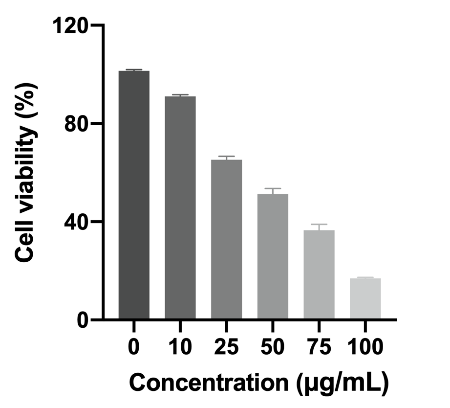


**Figure S3：**CCK8 assay of MDA-MB-231 cells in different groups.

| Concentration | 0ug/ml | 10ug/ml | 25ug/ml | 51.27±2.27 | 75ug/ml | 100ug/ml |
| --- | --- | --- | --- | --- | --- | --- |
| Mean±SD | 101.44±0.47 | 91.08±63 | 65.20±1.41 | 51.27±2.27 | 36.56±2.36 | 16.99±0.35 |


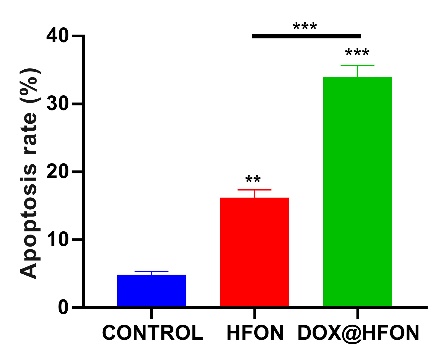


**Figure S4：**Quantitative analysis of apoptosis levels. (****P*<0.001, ***P* < 0.01)


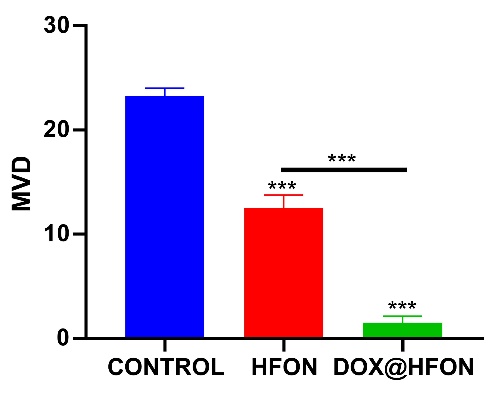


**Figure S5：**Quantitative analysis of angiogenesis levels.(****P* < 0.001)


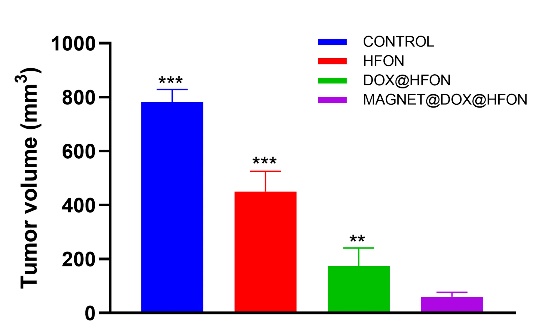


**Figure S6：**Tumor volume of isolated tumors in different treatment groups after 21 days of therapy(***P < 0.001, ***P* < 0.01).


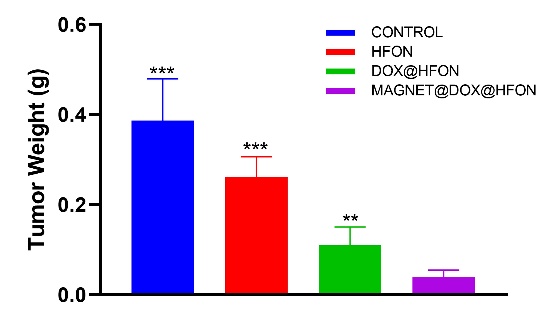


**Figure S7：**Tumor weight of isolated tumors after 21 days of therapy.(****P* < 0.001, ***P* < 0.01)


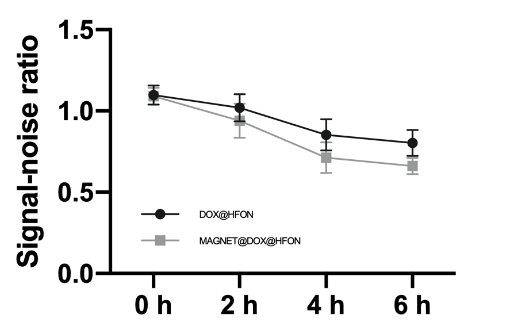


**Figure S8**：T2-weighted MRI signal-noise ratio.


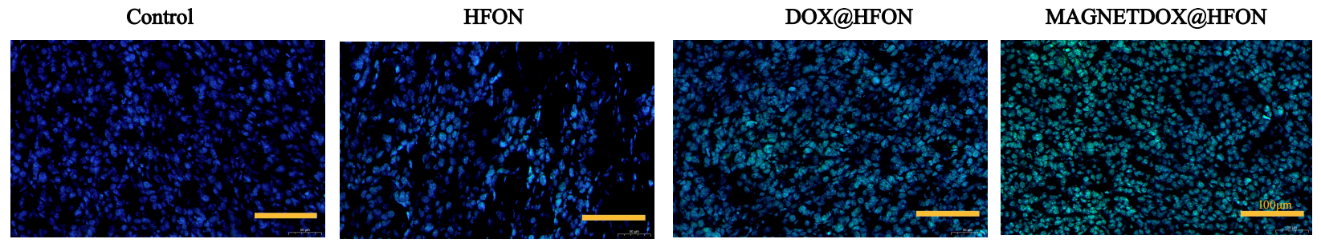


**Figure S9** : LPO immunofluorescence staining detection pictures of tumor sections in each group (the scale bar is 100μm).
